# Supplementary material for: An efficient and practical synthesis of chiral imidazolium ionic liquids and their application in an enantioselective Michael reaction
Source: Royal Society of Chemistry journal article supplement (doi:10.1039/b604801c), 2006-01-01

# An efficient and practical synthesis of chiral imidazolium ionic liquids and their application in enantioselective Michael reaction

Wen-Hua Ou and Zhi-Zhen Huang\*

*School of Chemistry and Chemical Engineering, Nanjing University, Nanjing 210093,*

*P. R. China.*

[huangzz@nju.edu.cn](mailto:huangzz@nju.edu.cn)

## Supplementary information

<sup>1</sup>H NMR and <sup>13</sup>C NMR

### Contents

|                                                                        |          |
|------------------------------------------------------------------------|----------|
| Spectra of 1-(2,4-Dinitrophenyl)-3-methylimidazolium chloride <b>1</b> | S2, S3   |
| Spectra of chiral imidazolium ionic liquid <b>2a</b>                   | S4, S5   |
| Spectra of chiral imidazolium ionic liquid <b>2b</b>                   | S6, S7   |
| Spectra of chiral imidazolium ionic liquid <b>2c</b>                   | S8, S9   |
| Spectra of diethyl 2-(3-oxo-1,3-diphenylpropyl)malonate <b>5</b>       | S10, S11 |

**1-(2,4-Dinitrophenyl)-3-methylimidazolium chloride (1).**

$^1\text{H NMR}$

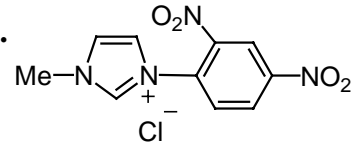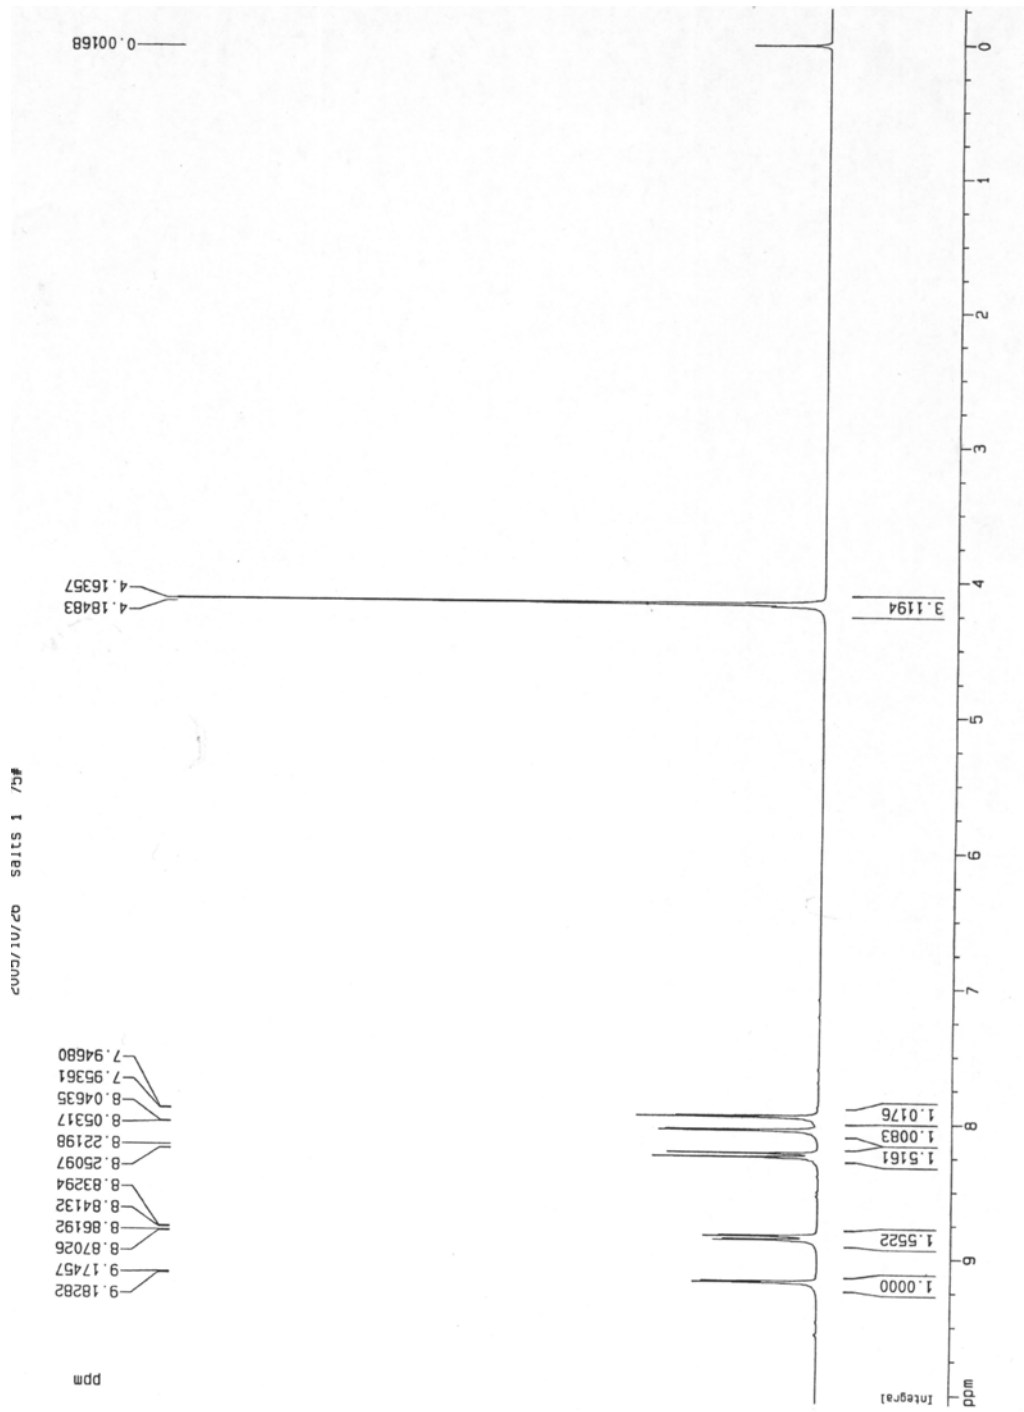

# 1-(2,4-Dinitrophenyl)-3-methylimidazolium chloride (1).

$^{13}\text{C}$  NMR

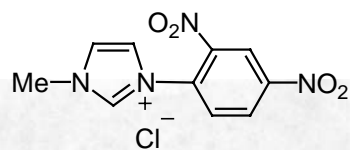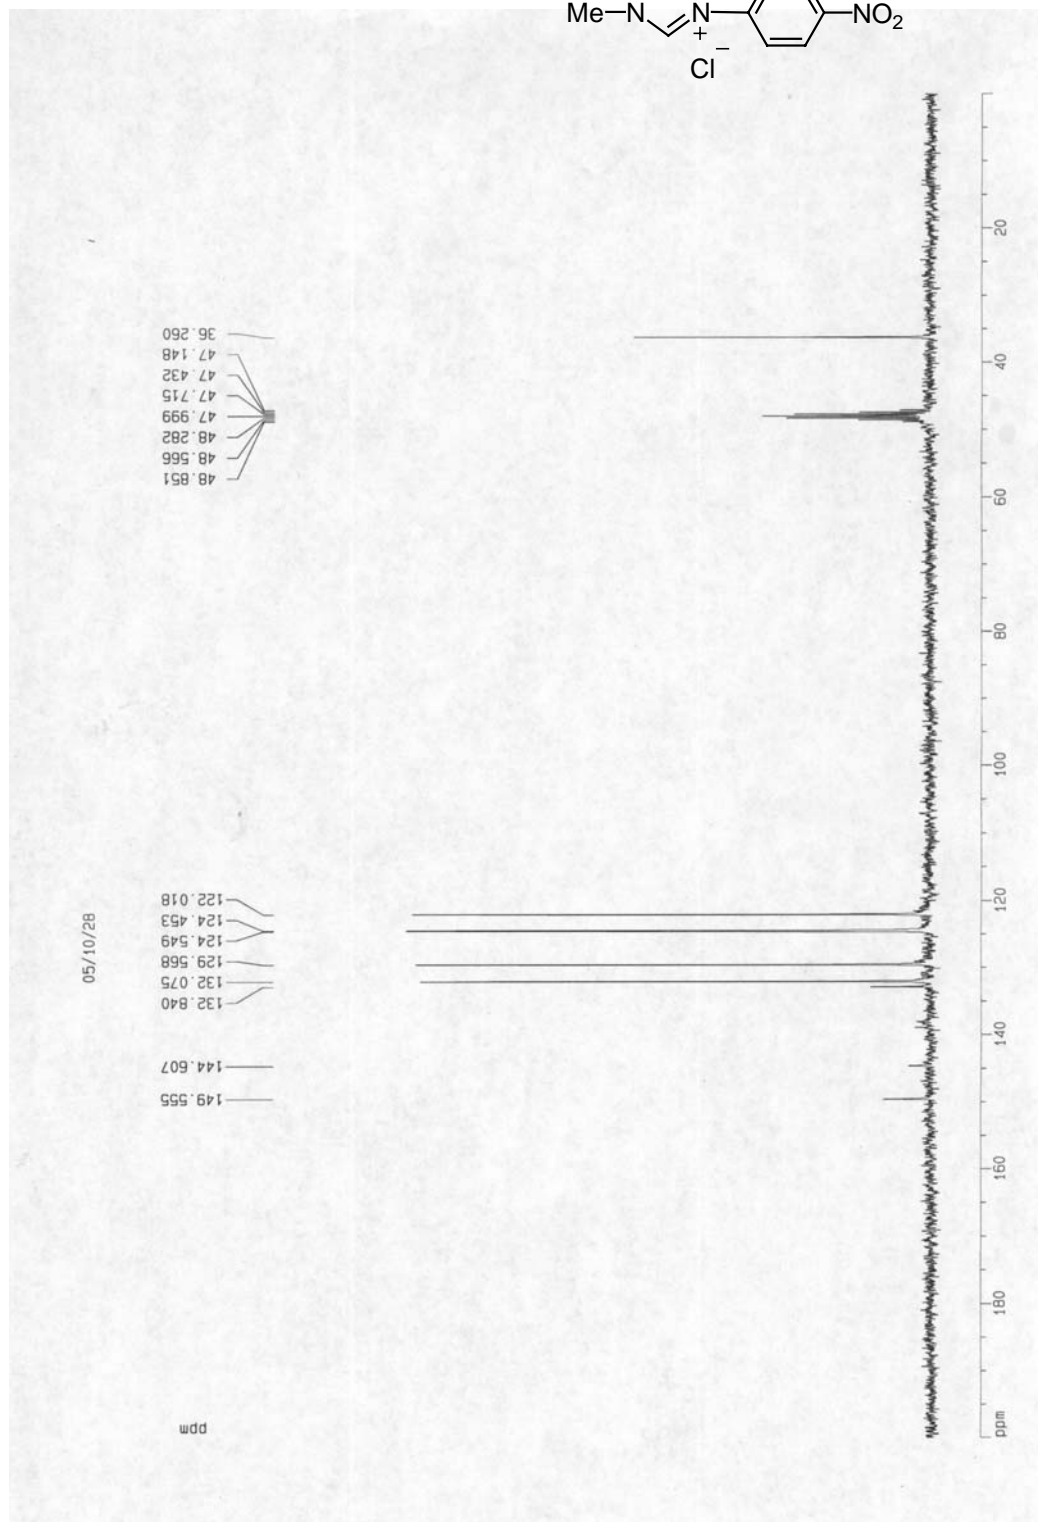

**L-1-Methyl-3-(1'-hydroxy-2'-propanyl)imidazolium Chloride (2a).**

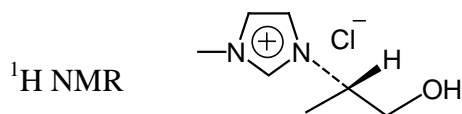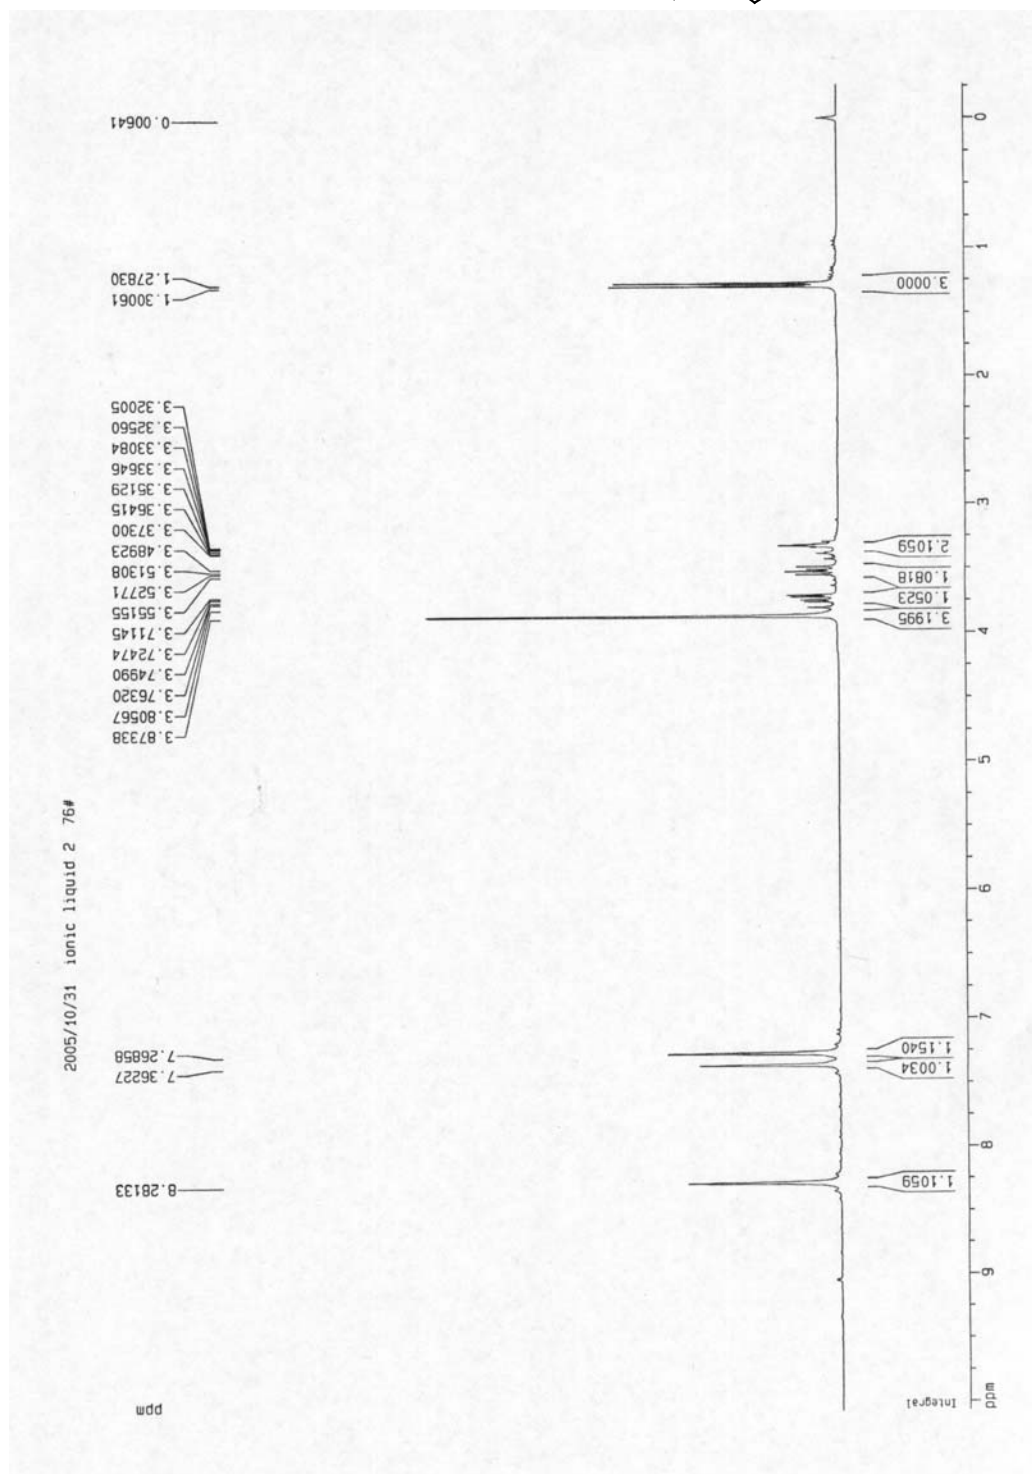

# L-1-Methyl-3-(1'-hydroxy-2'-propanyl)imidazolium Chloride (2a).

$^{13}\text{C}$  NMR

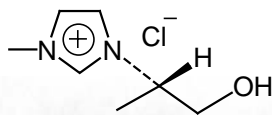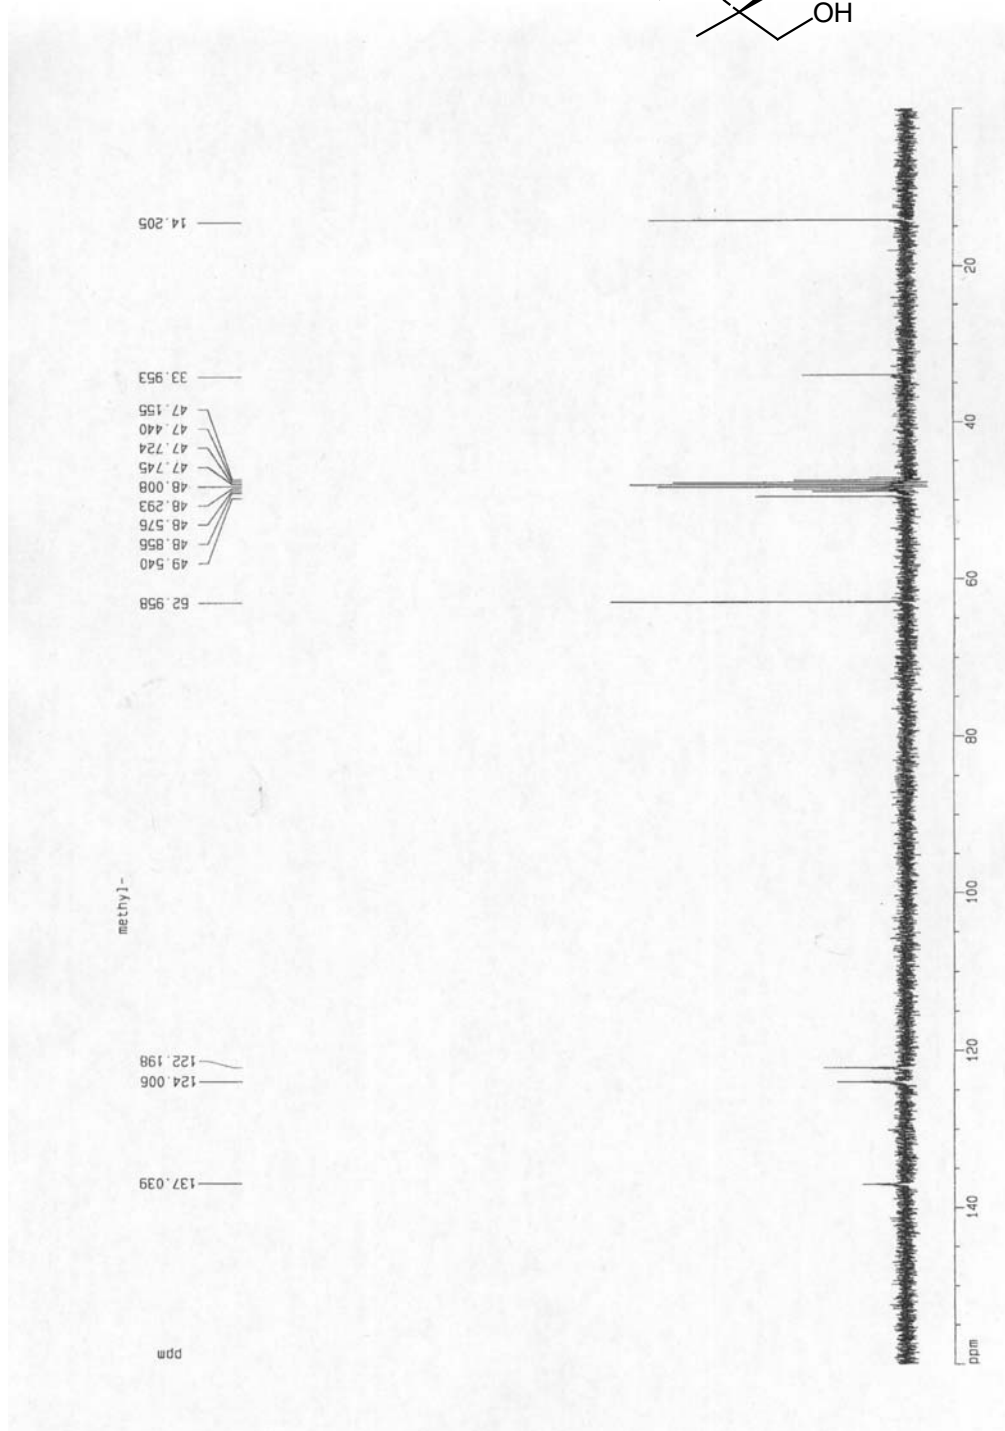

**L-1-Methyl-3-(1'-hydroxy-3'-methyl-2'-butanyl)imidazolium Chloride (2b).**

$^1\text{H NMR}$

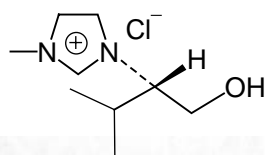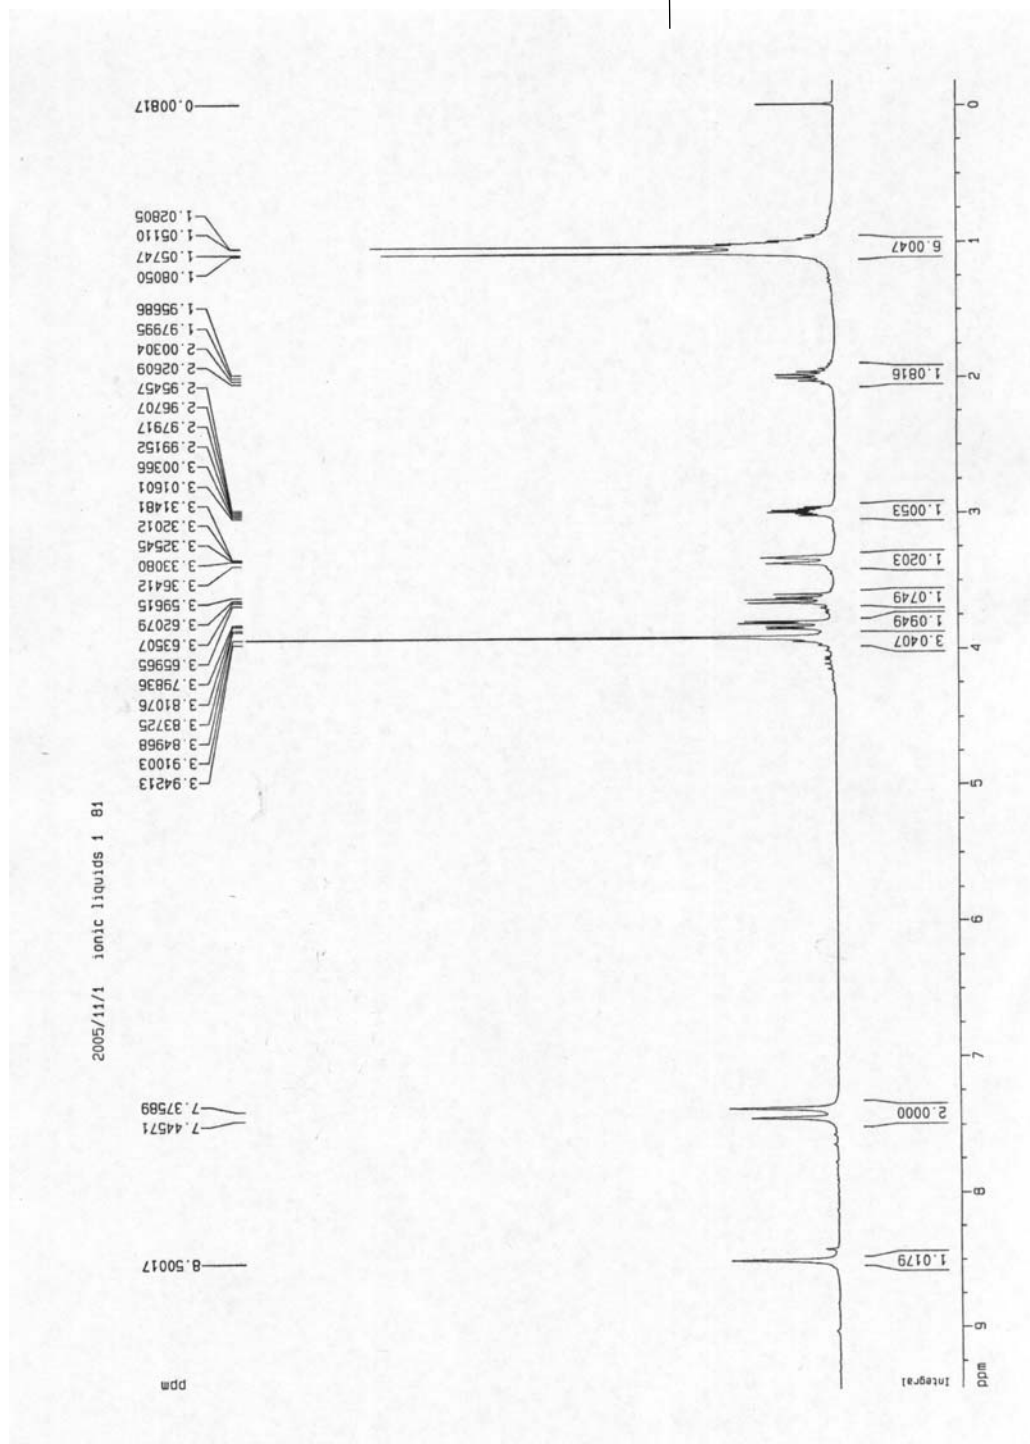

**L-1-Methyl-3-(1'-hydroxy-3'-methyl-2'-butanyl)imidazolium Chloride (2b).**

<sup>13</sup>C NMR

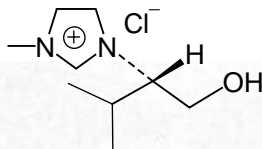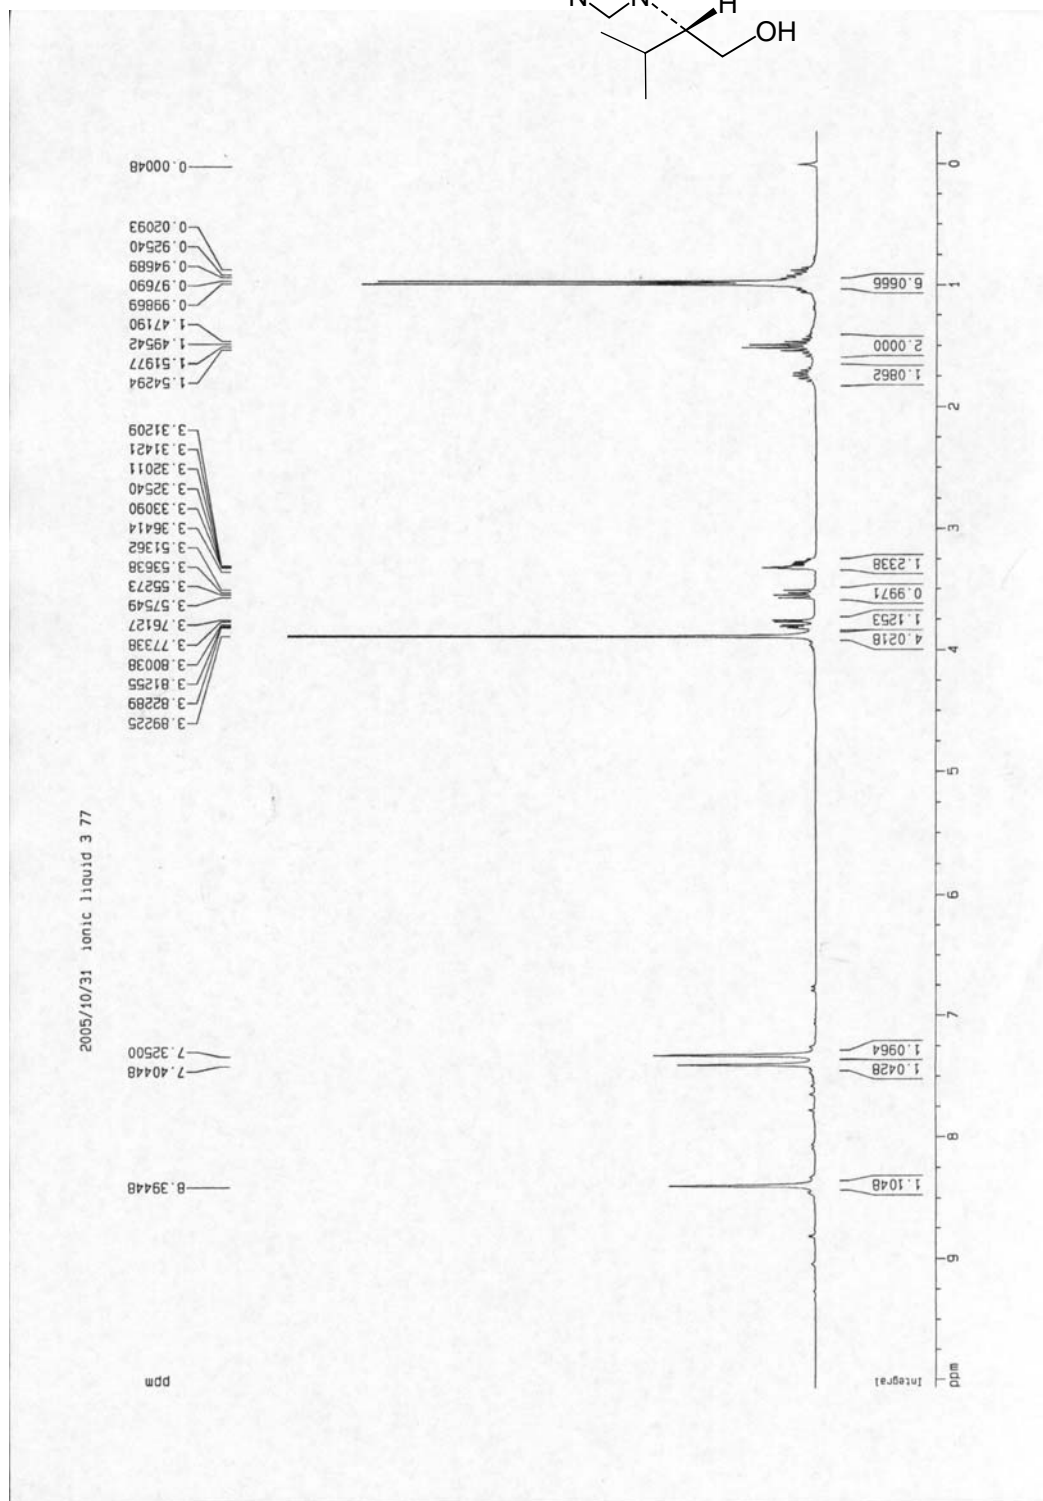

**L-1-Methyl-3-(1'-hydroxy-4'-methyl-2'-pentanyl)imidazolium Chloride (2c).**

$^1\text{H NMR}$

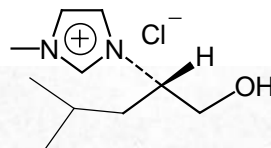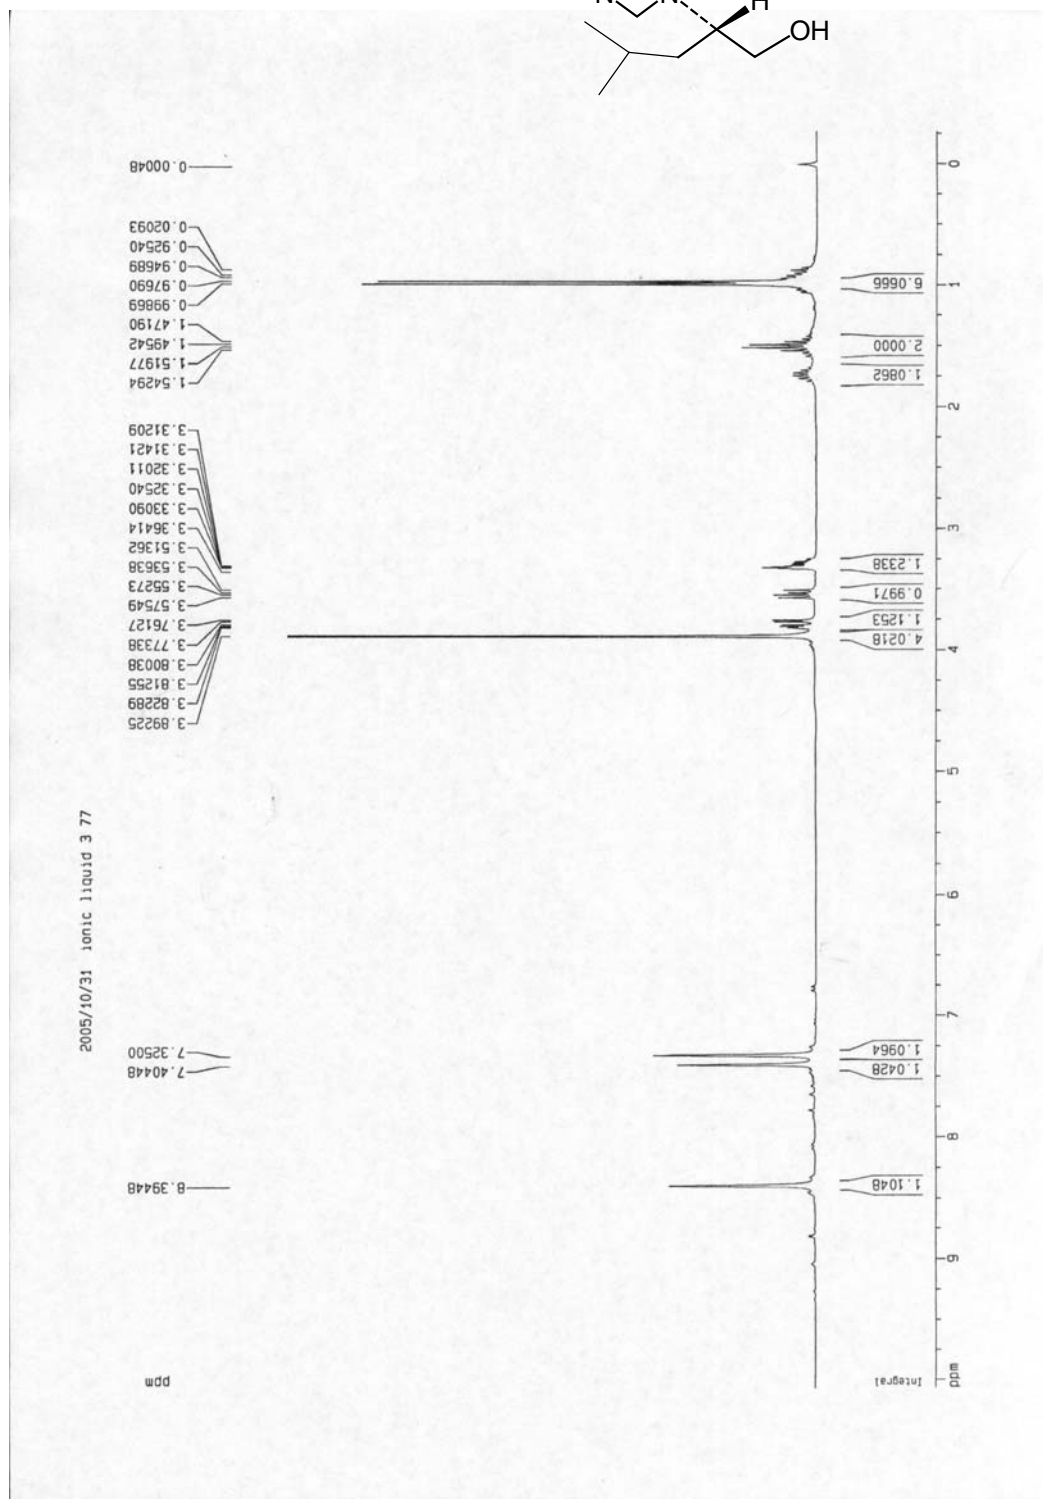



**L-1-Methyl-3-(1'-hydroxy-4'-methyl-2'-pentanyl)imidazolium Chloride (2c).**

$^{13}\text{C}$  NMR

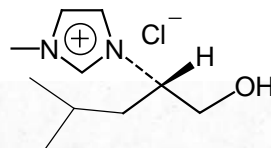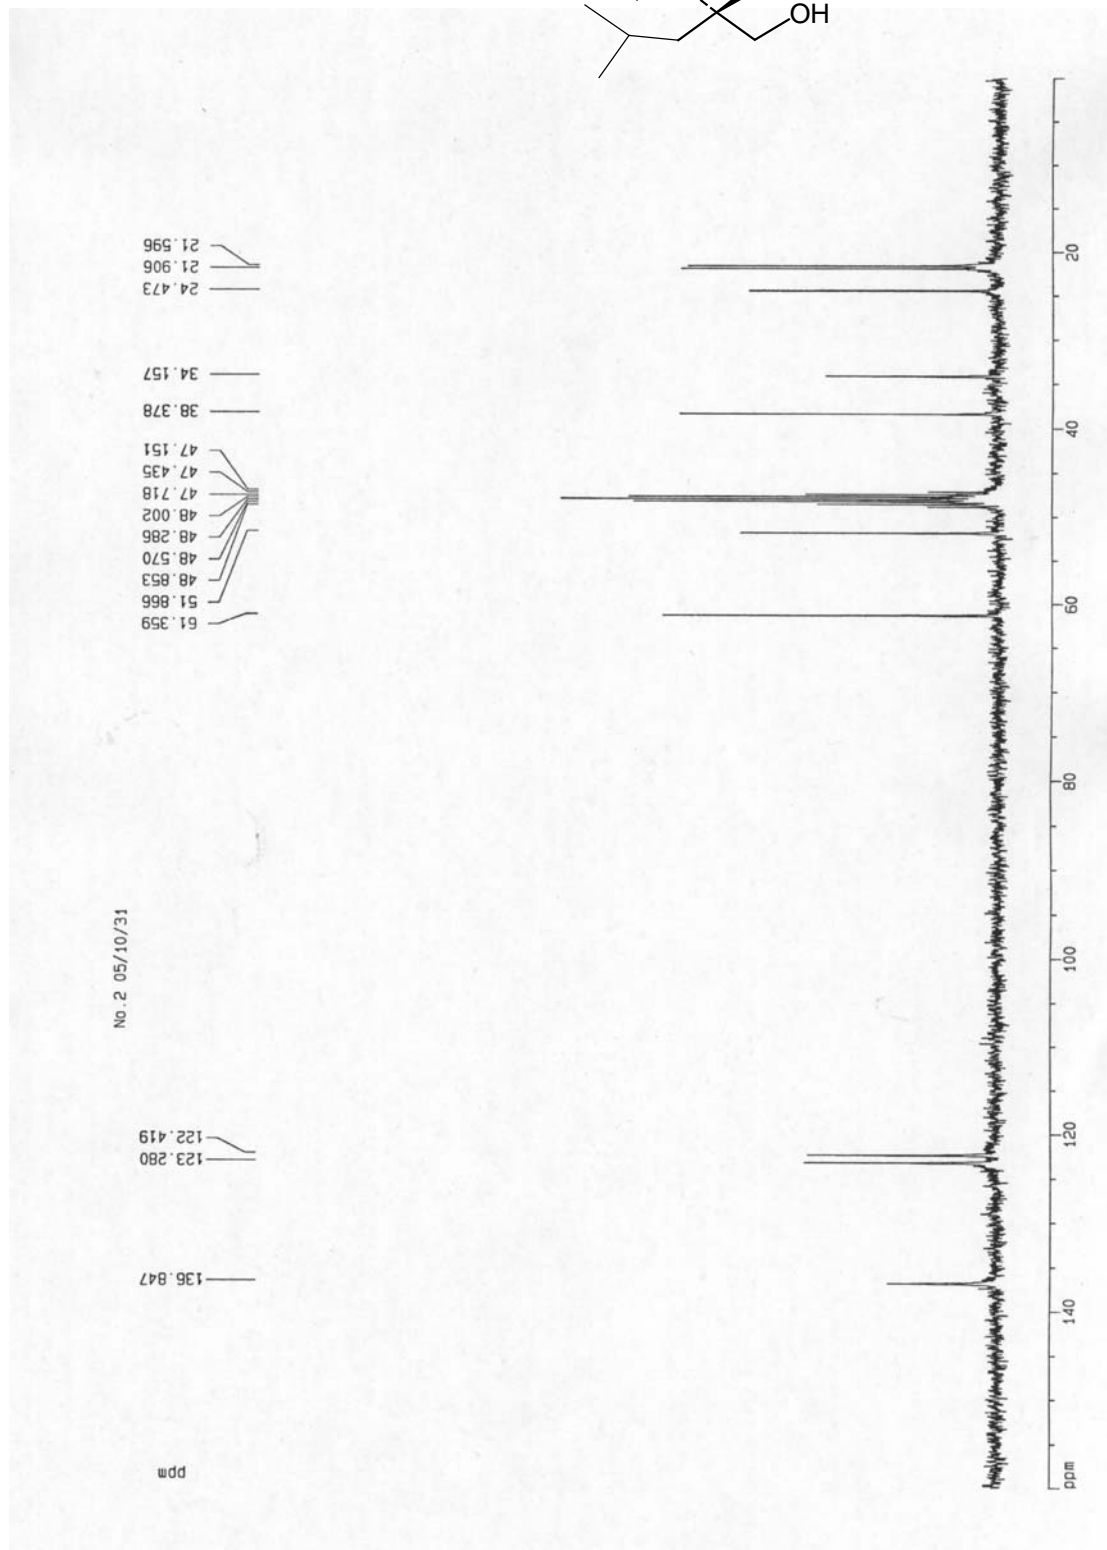

Diethyl 2-(3-oxo-1,3-diphenylpropyl)malonate (5).

$^1\text{H NMR}$

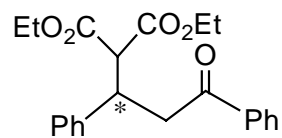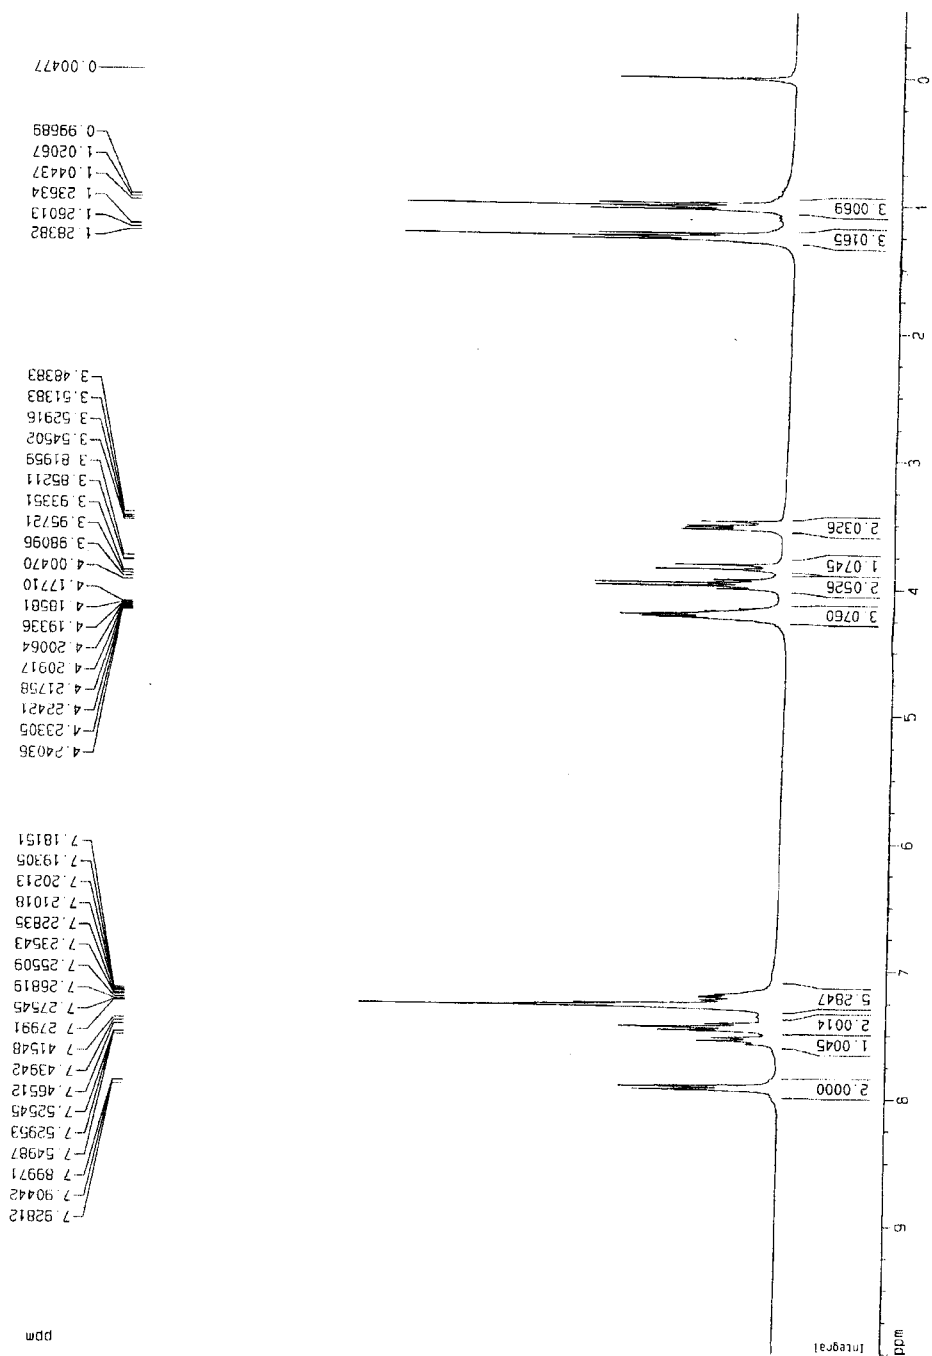

Diethyl 2-(3-oxo-1,3-diphenylpropyl)malonate (5).

$^{13}\text{C}$  NMR

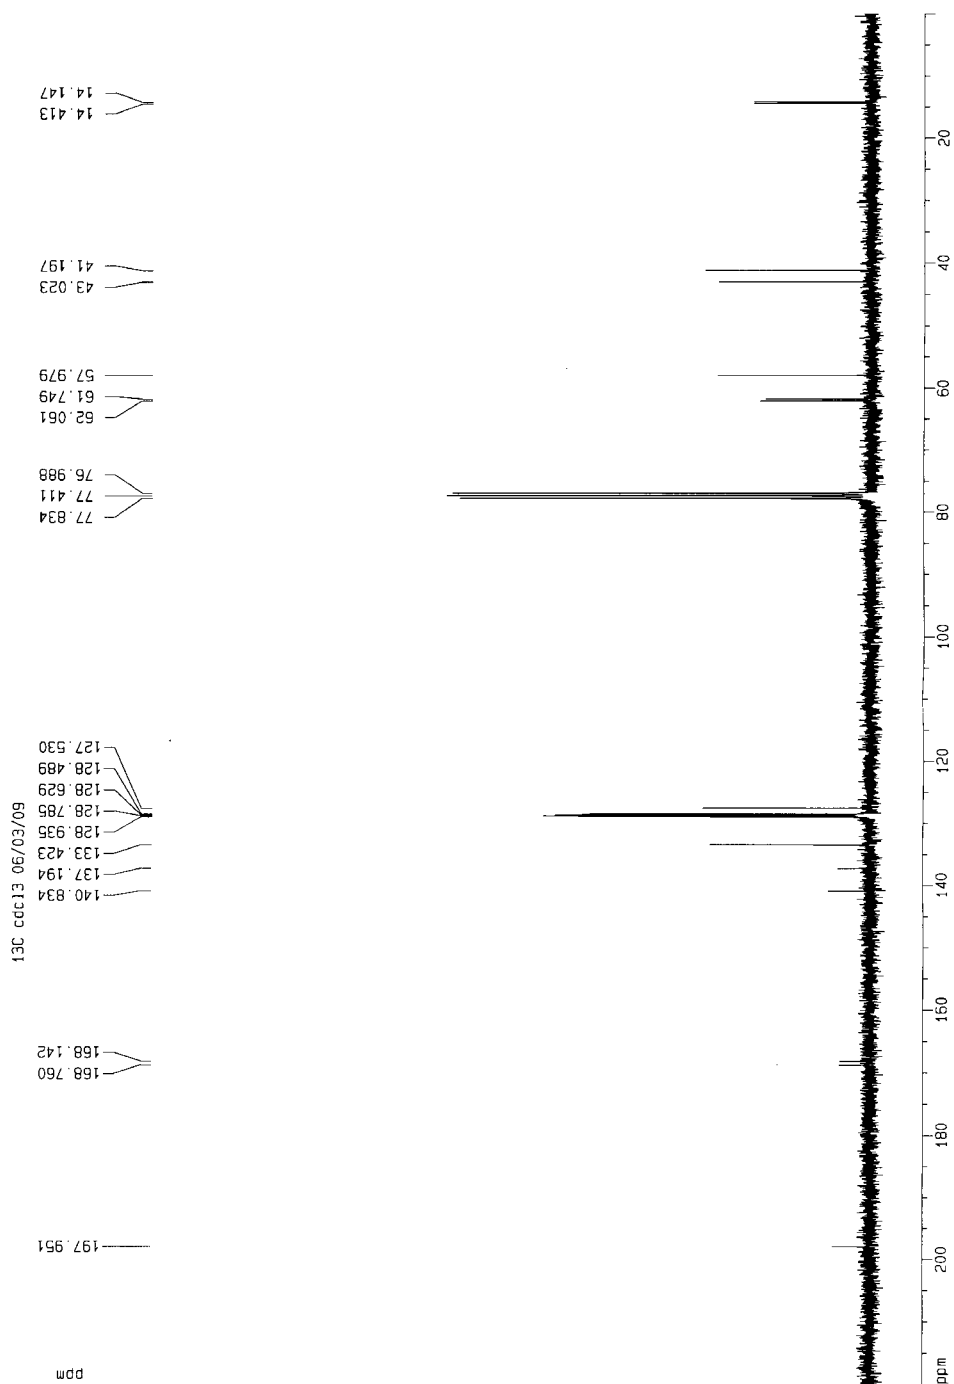

Supplement: b604801c.pdf [file b604801c.pdf]
